# Supplementary material for: Inhibition of soluble epoxide hydrolase reverses bone loss in periodontitis by upregulating EMCN and inhibiting osteoclasts
Source: PubMed Central journal article supplement — Stem Cell Res Ther. 2024 Nov 25;15:451. doi: 10.1186/s13287-024-04054-y (PMC11590356; doi:10.1186/s13287-024-04054-y), 2024-11-25

# Additional file 3: Uncropped blot of Fig. 2c for EMCN

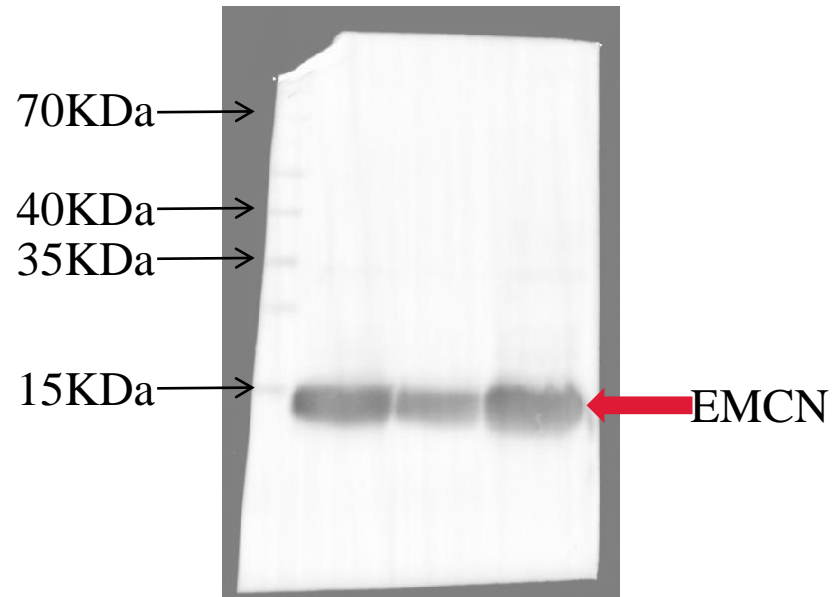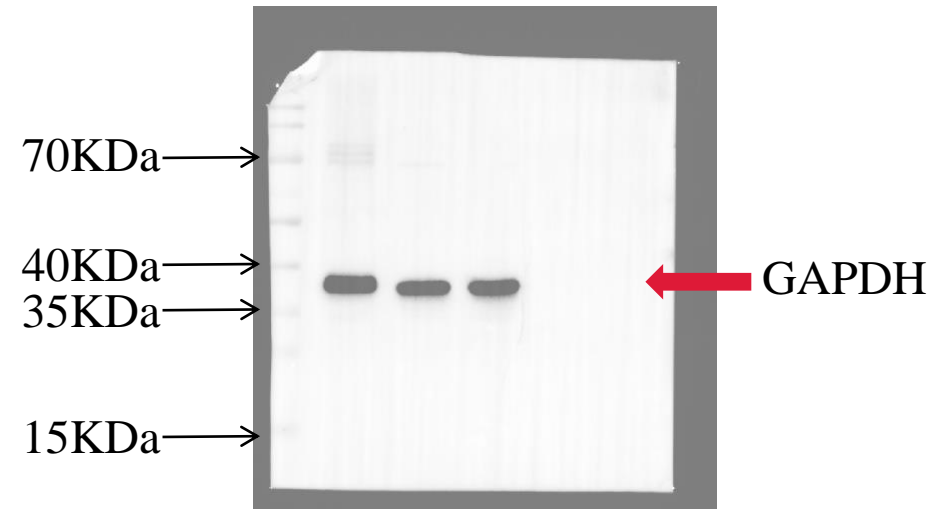

# Additional file 3: Uncropped blot of Fig. 2d for EMCN

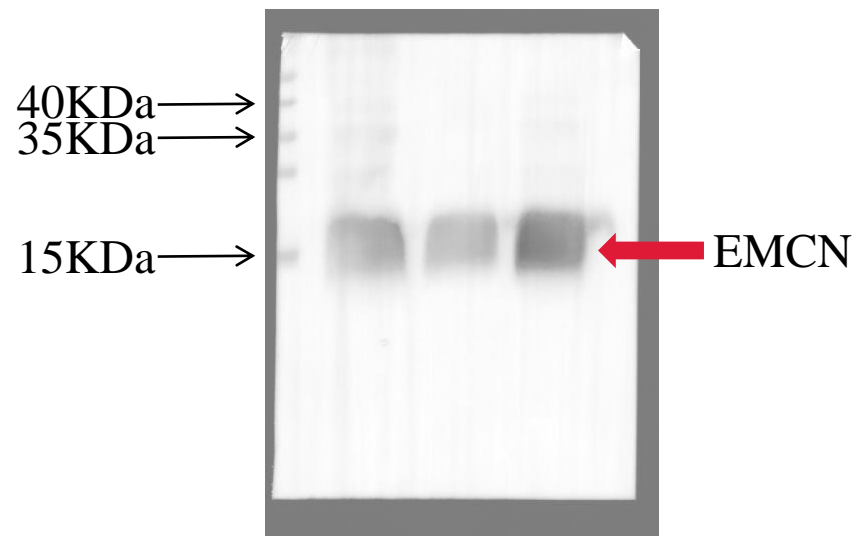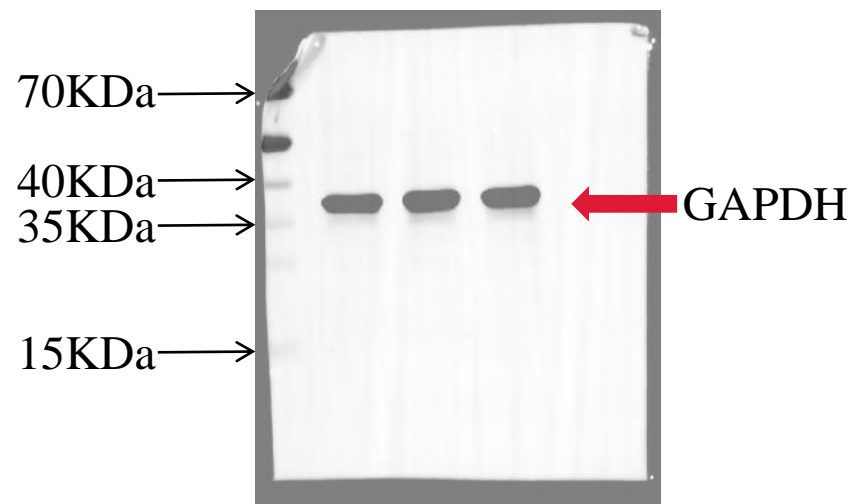

# Additional file 3: Uncropped blot of Fig. 3b for EMCN

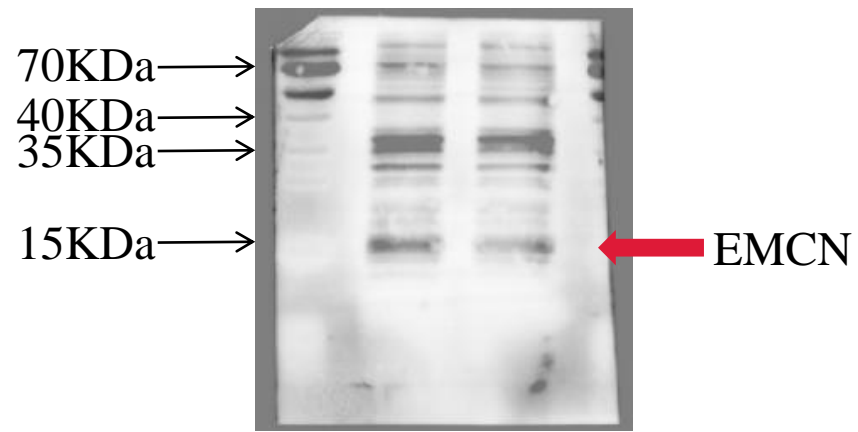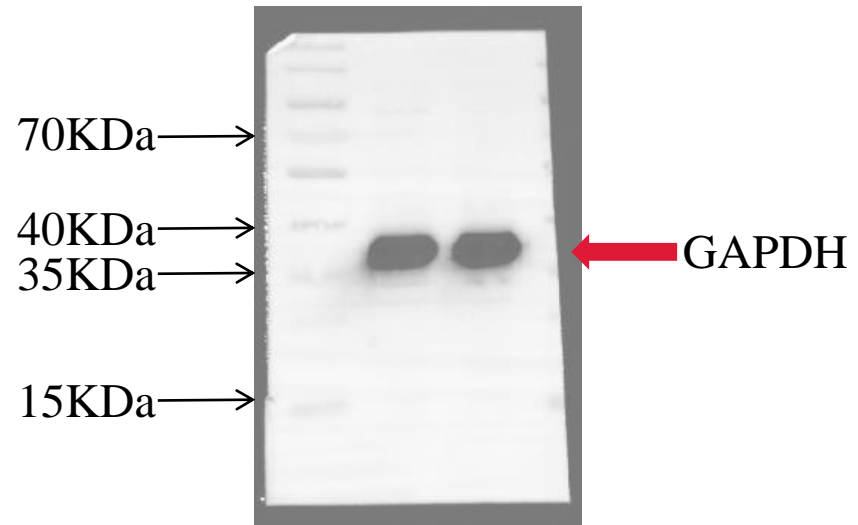

# Additional file 3: Uncropped blot of Fig. 3e for EMCN

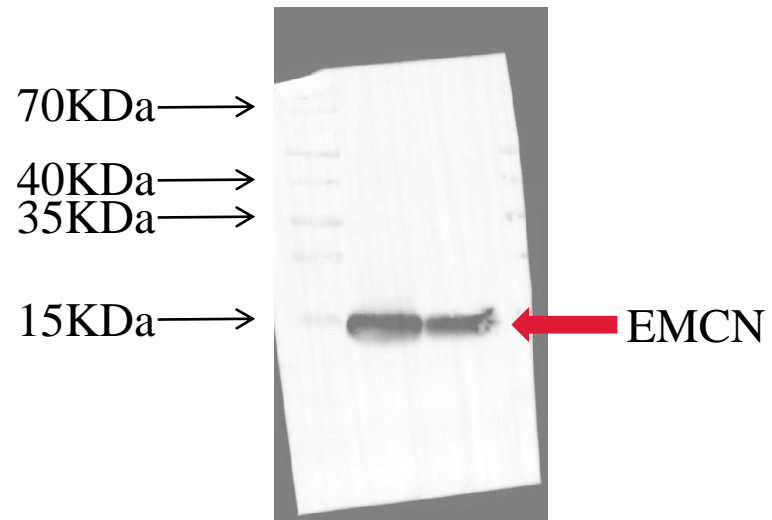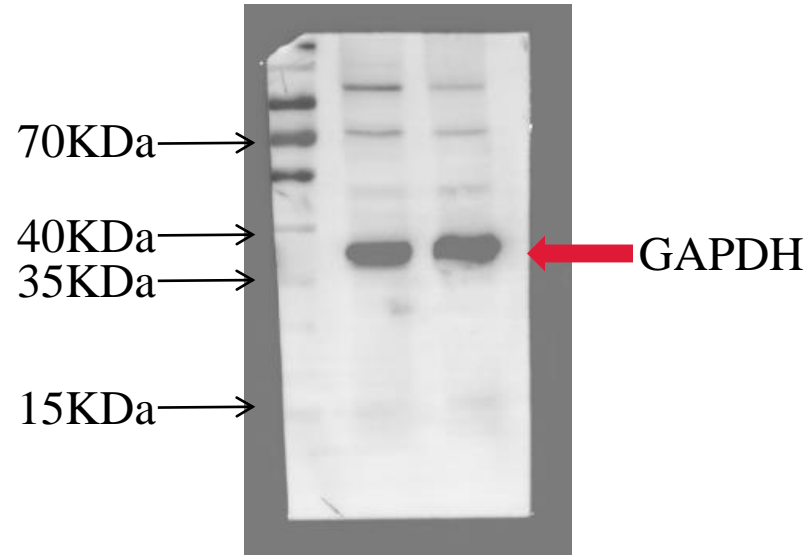

# Additional file 3: Uncropped blot of Fig. 4b for HIF-1 $\alpha$

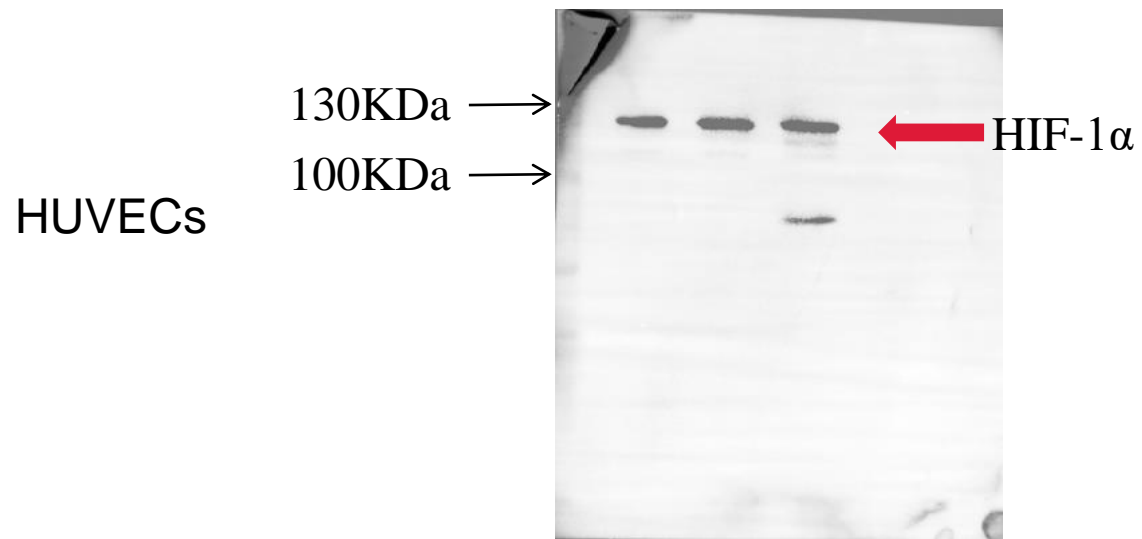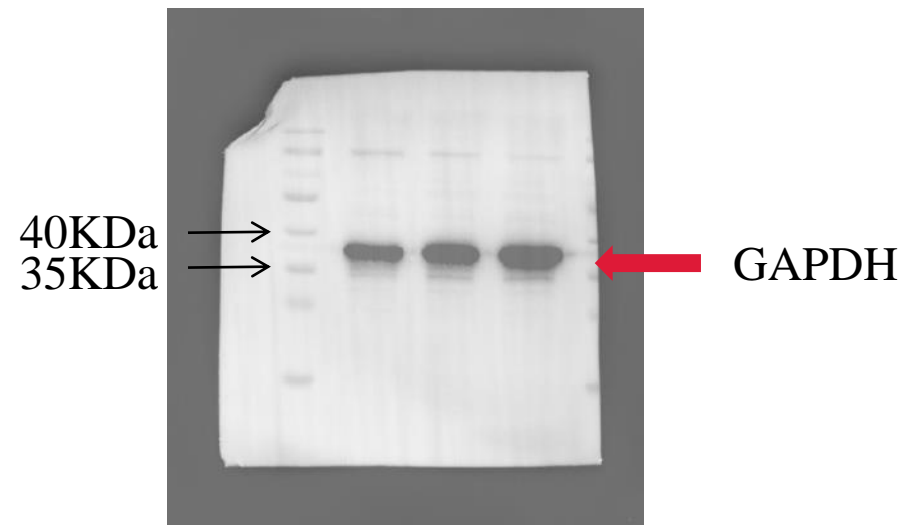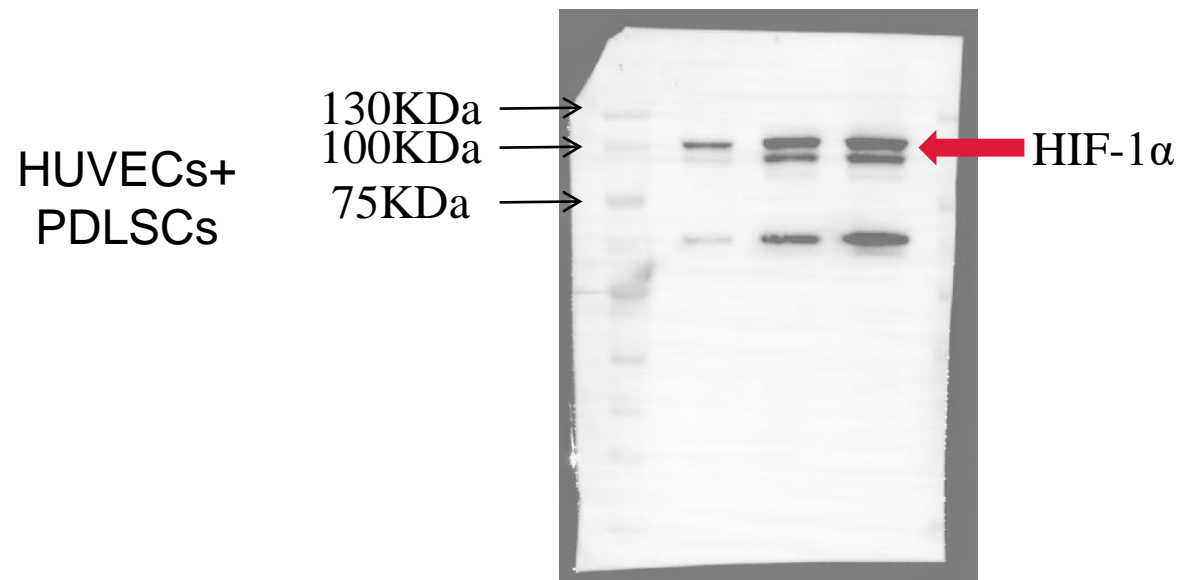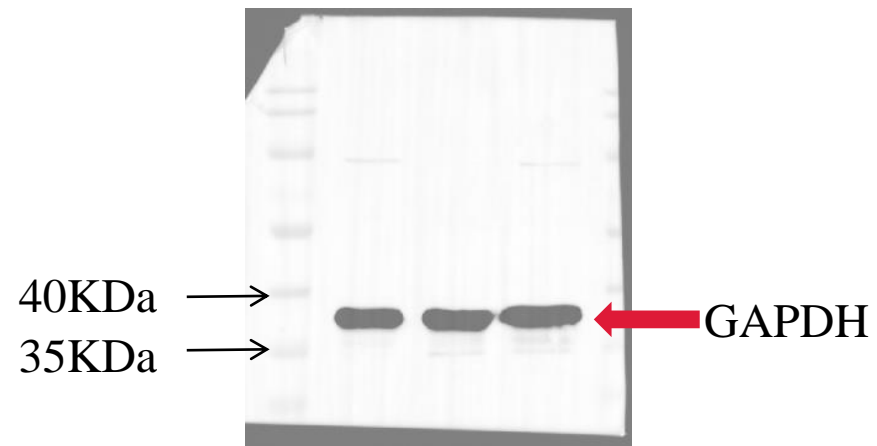

# Additional file 3: Uncropped blot of Fig. 4c for HIF-1 $\alpha$

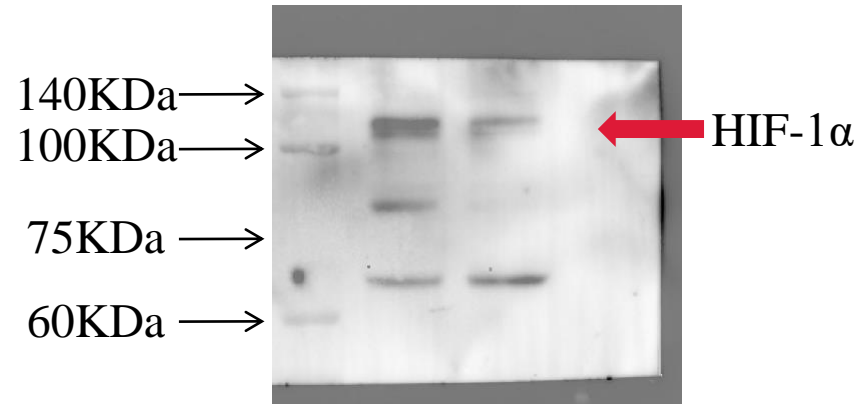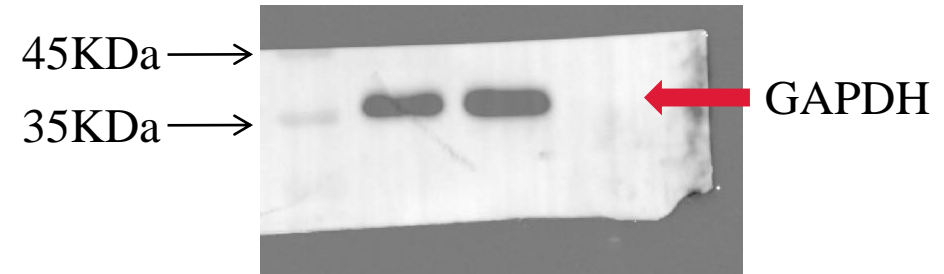

# Additional file 3: Uncropped blot of Fig. 4f for EMCN

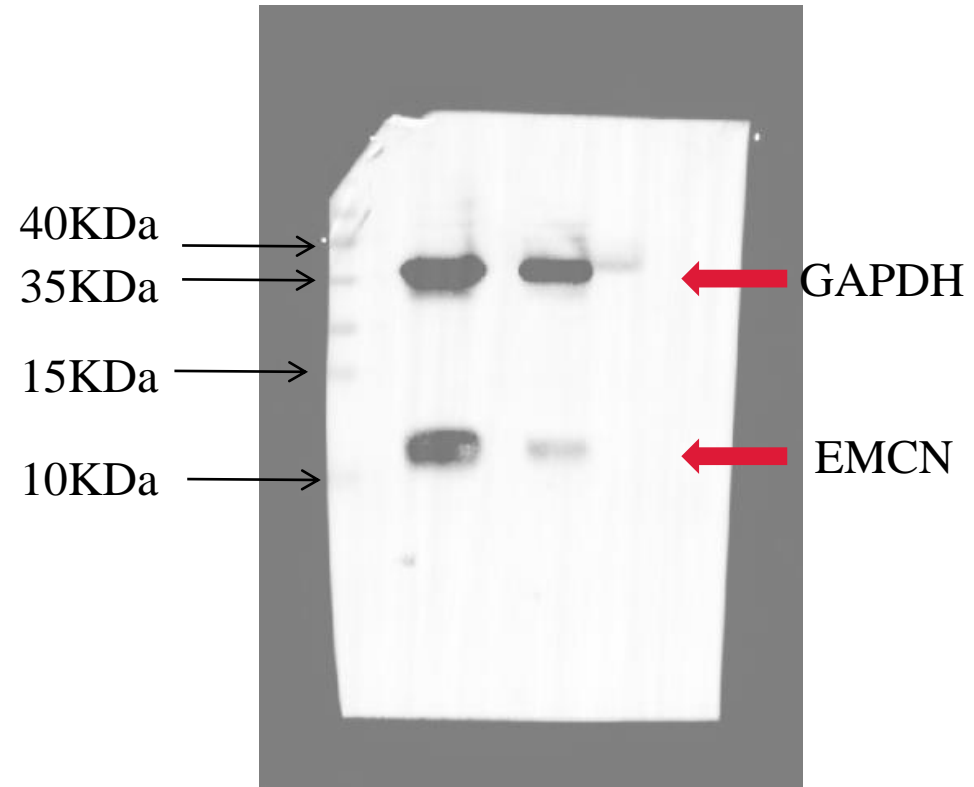

# Additional file 3: Uncropped blot of Fig. 4g for EMCN

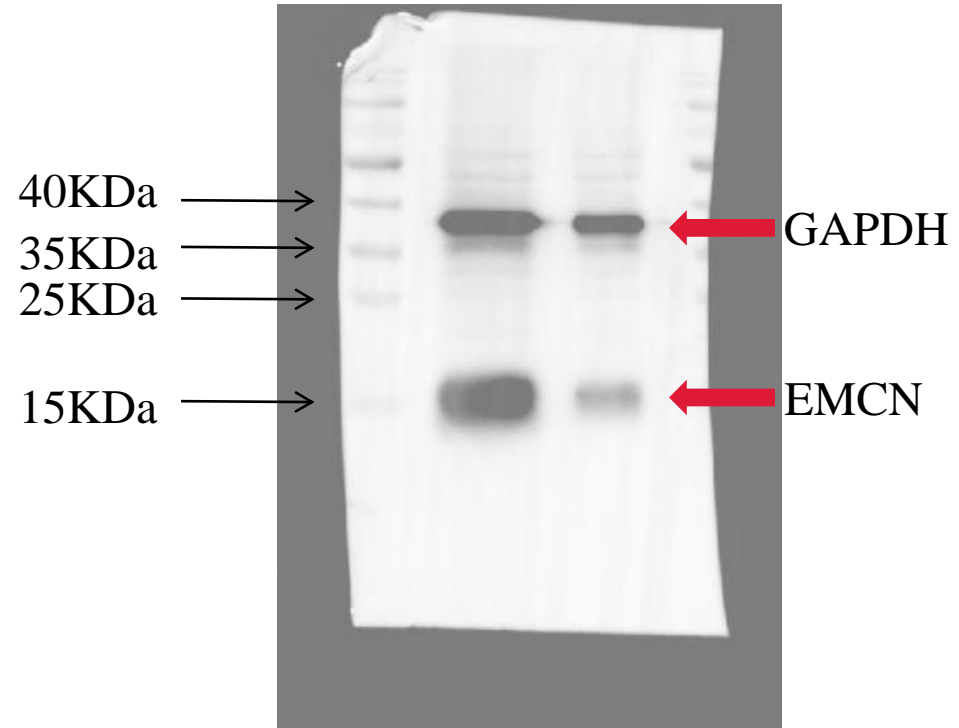

Supplement: 13287_2024_4054_MOESM3_ESM.pdf [file 13287_2024_4054_MOESM3_ESM.pdf]
