# Supplementary material for: Inhibition of soluble epoxide hydrolase reverses bone loss in periodontitis by upregulating EMCN and inhibiting osteoclasts
Source: PubMed Central journal article supplement — Stem Cell Res Ther. 2024 Nov 25;15:451. doi: 10.1186/s13287-024-04054-y (PMC11590356; doi:10.1186/s13287-024-04054-y), 2024-11-25
Supplement: 13287_2024_4054_MOESM4_ESM.pdf [file 13287_2024_4054_MOESM4_ESM.pdf]

# Figure. S1

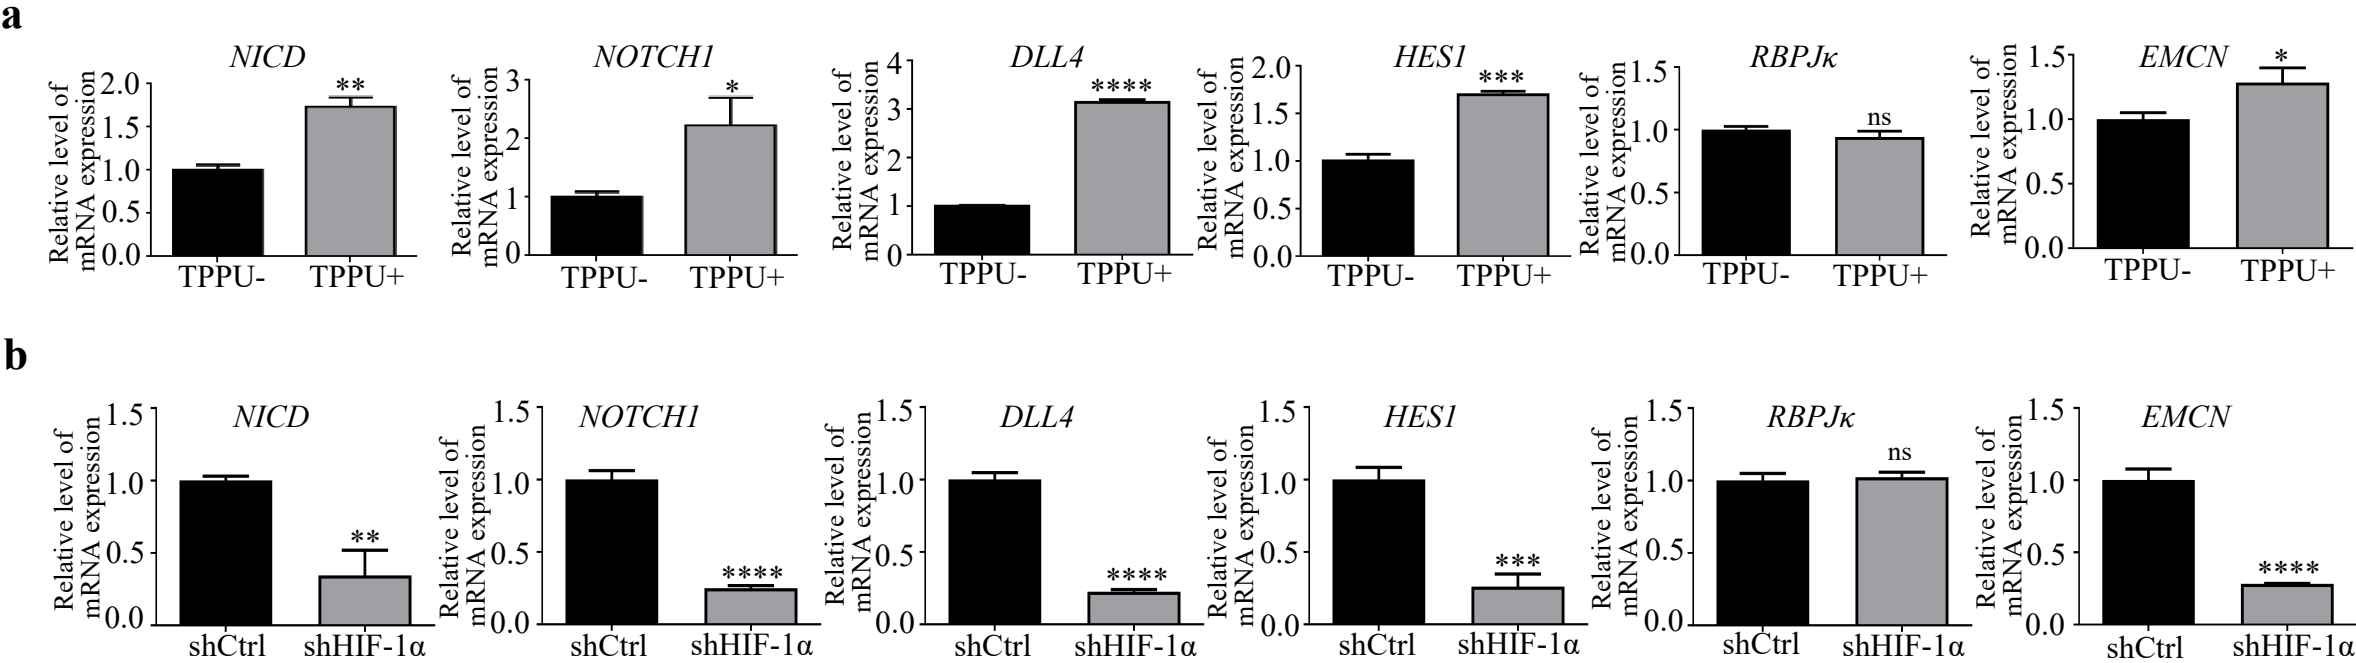

**Fig. S1 TPPU regulates Notch signaling pathway via HIF-1α.** a: RT-qPCR showing the expression levels of Notch signaling pathway related genes in TPPU- and TPPU+ groups of coculture system. b: Knockdown HIF-1α in HUVECs, and then co-culture with PDLSCs under the treatment of TPPU, RT-qPCR detection the expression of Notch signaling pathway-related gene. \*  $P < 0.05$ , \*\*  $P < 0.01$ , \*\*\*  $P < 0.001$ , \*\*\*\*  $P < 0.0001$ .
